# Supplementary material
Source: publisher site journal article supplement (https://www.spandidos-publications.com/2020/downloadSupplementary)
Supplement: Supplementary file 1 [file downloadSupplementary]

Table SI. Results of motor and sensory nerve conduction studies performed on May 13 for patient number 6.

| A, Motor nerve conduction velocity                  |               |                    |                          |
|-----------------------------------------------------|---------------|--------------------|--------------------------|
| Site                                                | Latency, msec | Amplitude, mV      | Conduction velocity, m/s |
| Common peroneal, dorsum pedis (right)               | 2.7           | 1.3                |                          |
| Capitula fibula (right)                             | 7.9           | 1.1                | 54.3                     |
| Posterior tibial, ankle (right)                     | 3.9           | 6.9                |                          |
| Popliteus (right)                                   | 11.3          | 7.9                | 47.7                     |
| Common peroneal, dorsum pedis (left)                | 3.1           | 0.5                |                          |
| Capitula fibula (left)                              | 8.3           | 0.6                | 51.1                     |
| Posterior tibial, ankle (left)                      | 4.0           | 6.9                |                          |
| Popliteus (left)                                    | 11.2          | 5.9                | 48.6                     |
| Median wrist (left)                                 | 2.8           | 8.9                |                          |
| Elbow (left)                                        | 5.9           | 8.8                | 63.9                     |
| Ulnar wrist (left)                                  | 2.3           | 9.2                |                          |
| Above elbow (left)                                  | 4.3           | 7.5                | 62.5                     |
| B, Sensory nerve conduction velocity                |               |                    |                          |
| Site                                                | Latency, msec | Amplitude, $\mu$ V | Conduction velocity, m/s |
| Superficial peroneal, lateral lower leg 1/3 (right) | 2.3           | 9.3                | 55.3                     |
| Sural, lateral-inferior lower leg 1/3 (right)       | 2.6           | 11.0               | 56.6                     |
| Superficial peroneal, lateral lower leg 1/3 (left)  | 2.5           | 10.1               | 54.0                     |
| Sural, lateral-inferior lower leg 1/3 (left)        | 2.3           | 8.4                | 58.2                     |
| Median, wrist-middle finger (left)                  | 2.2           | 23.5               | 64.8                     |
| Ulnar, wrist-little finger (left)                   | 1.9           | 22.3 $\mu$ V       | 66.1                     |

Table SII. Results of F-wave study performed on May 13 for patient number 6.

| Nerve                          | F-wave study         |                      |                   | Occurrence rate of F-wave (%) |
|--------------------------------|----------------------|----------------------|-------------------|-------------------------------|
|                                | F-wave latency, msec | M-wave latency, msec | F-M latency, msec |                               |
| Posterior tibial nerve (right) | 39.8                 | 3.8                  | 36.0              | 100                           |
| Posterior tibial nerve (left)  | 40.4                 | 3.7                  | 36.7              | 100                           |
| Median nerve (left)            | 22.1                 | 3.0                  | 19.2              | 100                           |

Table SIII. Results of electromyogram performed on May 13 for patient number 6.

| Muscle                            | Insertional activity | F-wave study results |                      |               |          |
|-----------------------------------|----------------------|----------------------|----------------------|---------------|----------|
|                                   |                      | Fibrillation         | Positive sharp waves | Fasciculation | Myotonia |
| Tibialis anterior (right)         | Normal               | +2                   | +2                   | 0             | 0        |
| Gastrocnemius (right)             | Normal               | 0                    | 0                    | 0             | 0        |
| Peroneus longus (right)           | Normal               | 0                    | 0                    | 0             | 0        |
| Extensor digitorum brevis (right) | Normal               | +1                   | +2                   | 0             | 0        |
| Vastus medialis (right)           | Normal               | 0                    | 0                    | 0             | 0        |
| Biceps femoris (right)            | Normal               | +1                   | +2                   | 0             | 0        |
| Tibialis anterior (left)          | Normal               | +2                   | +2                   | 0             | 0        |
| Gastrocnemius (left)              | Normal               | 0                    | 0                    | 0             | 0        |
| Biceps femoris (left)             | Normal               | +2                   | +2                   | 0             | 0        |
| Paraspinal muscle L4 (right)      | Normal               | +1                   | +2                   | 0             | 0        |
